# Supplementary material for: Preparation and Evaluation of Antidiabetic Agents of Berberine Organic Acid Salts for Enhancing the Bioavailability
Source: PubMed Central journal article supplement (PMC6337101; doi:10.3390/molecules24010103), 2018-12-28
Supplement: molecules-24-00103-s001.pdf [file molecules-24-00103-s001.pdf]

BH  
13C  
DMSO

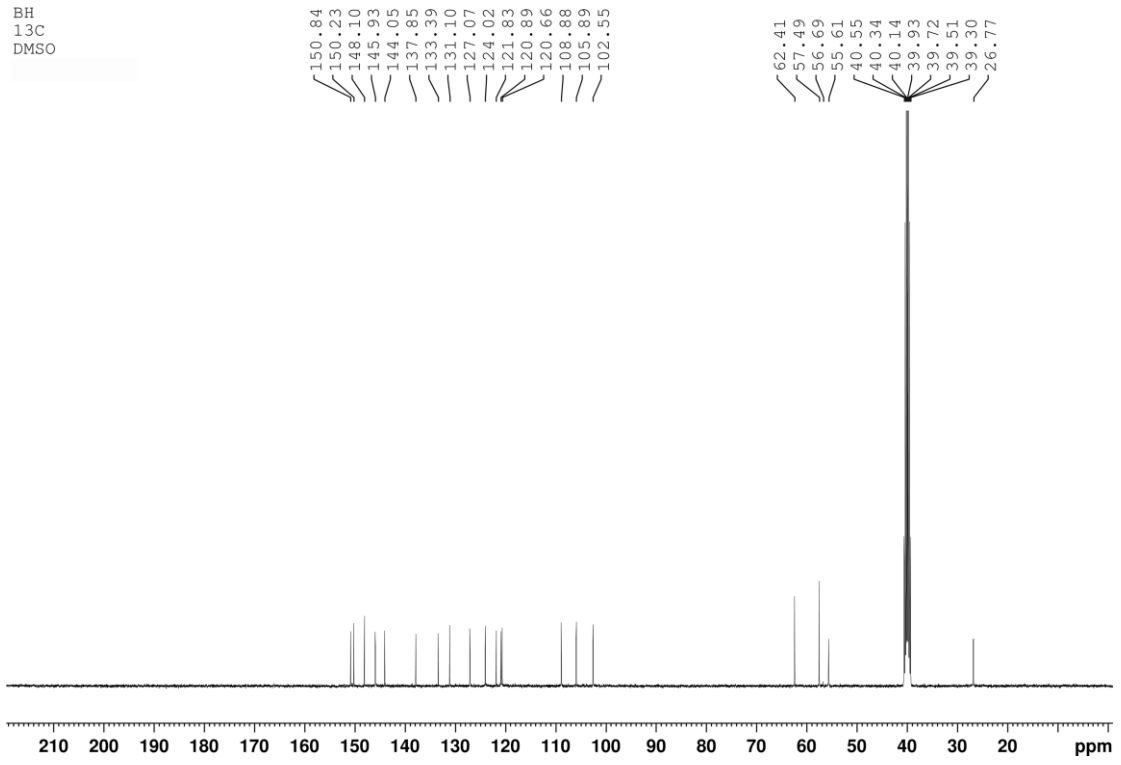

BC  
13C  
DMSO

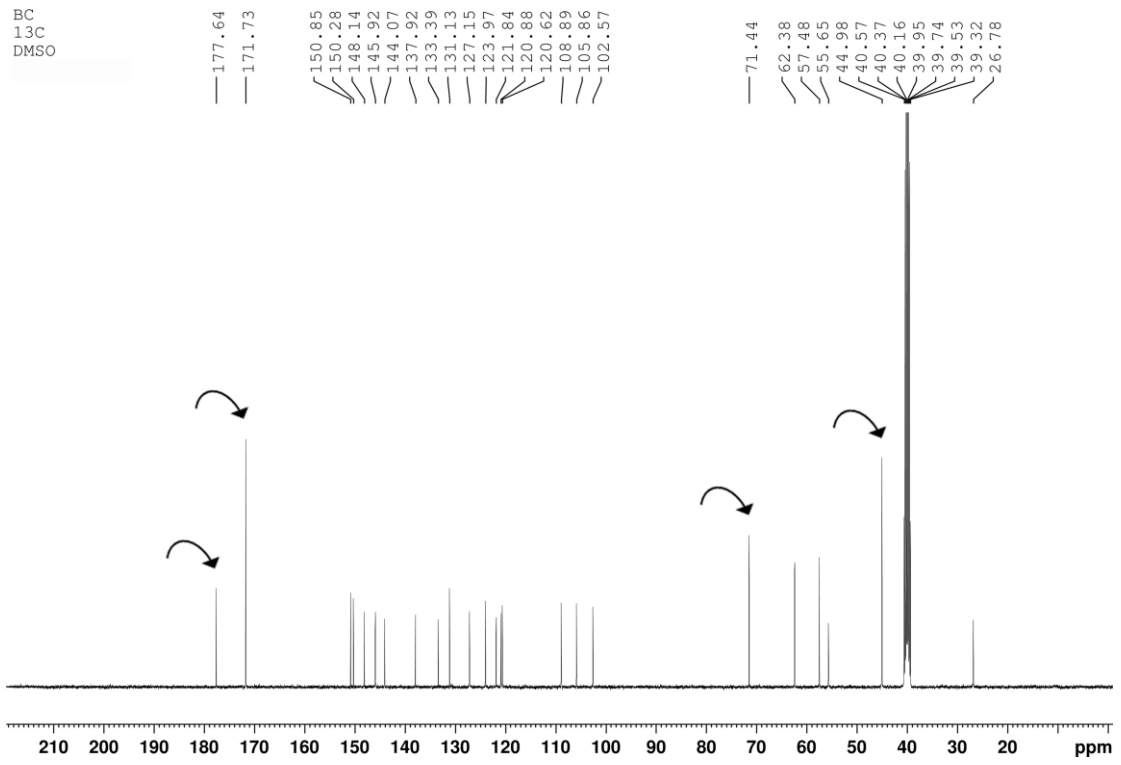

BM  
13C  
DMSO

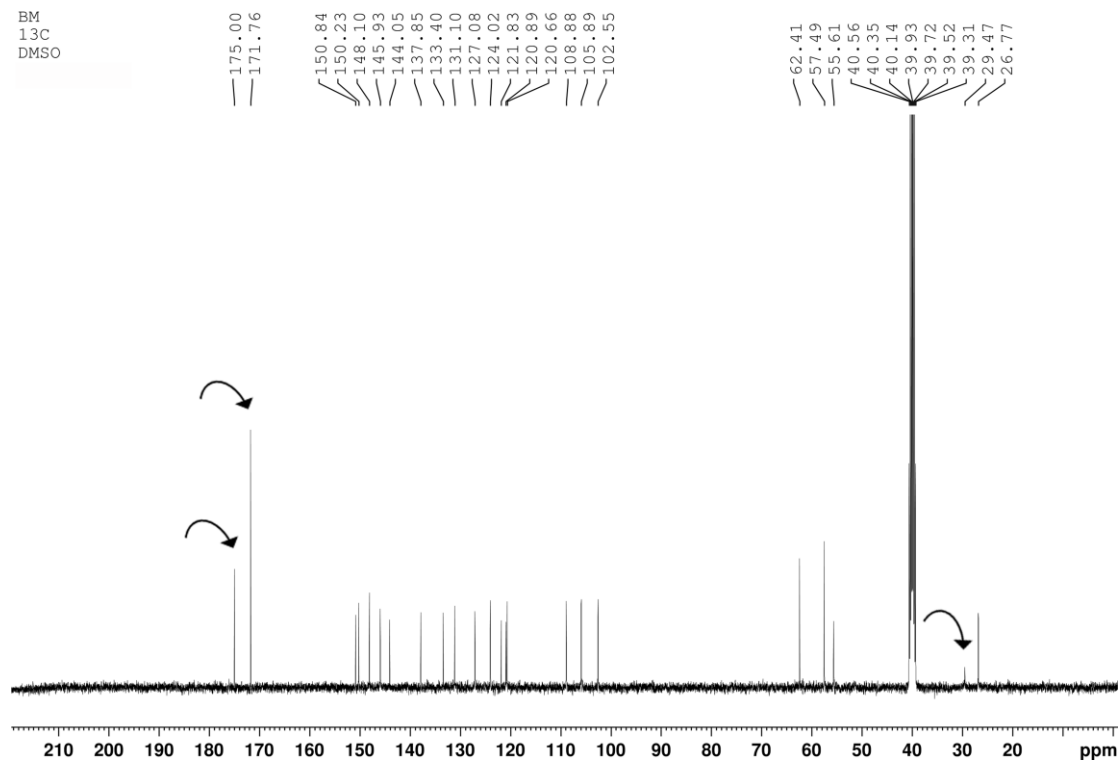

BS  
13C  
DMSO

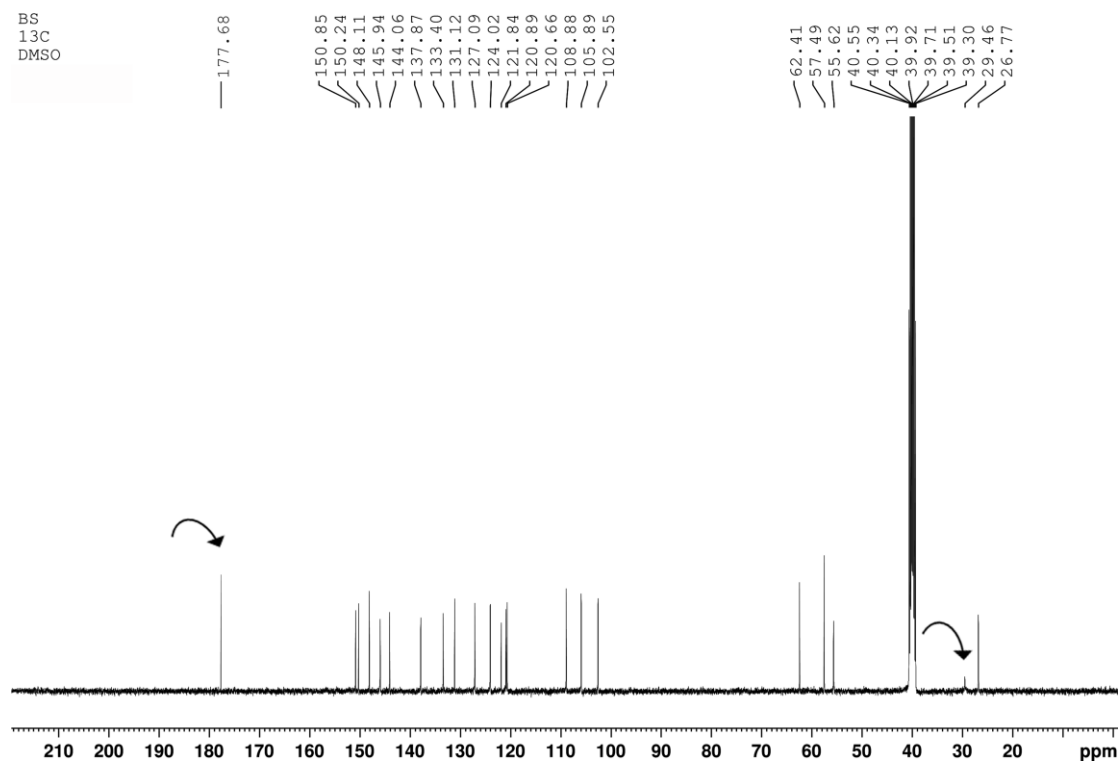

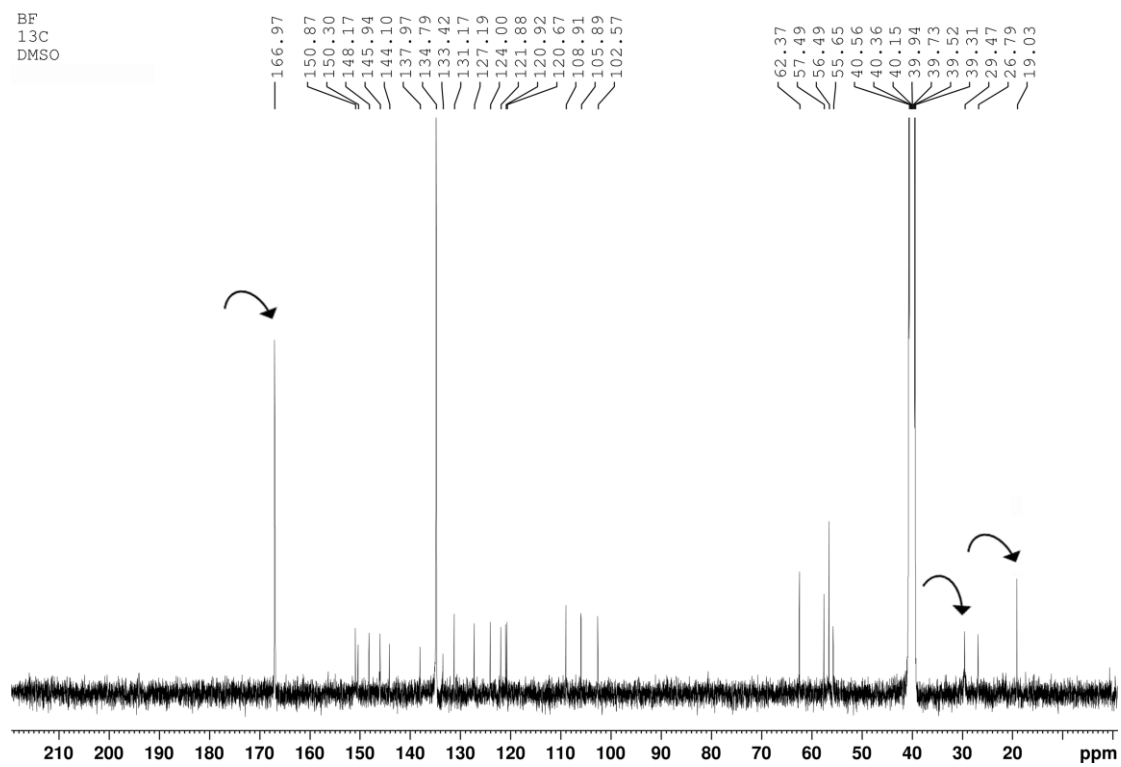

Fig. A.1.  $^{13}\text{C}$ NMR spectra of berberine hydrochloride (BH), berberine citrate (BC), berberine succinate (BS), berberine malate (BM) and berberine fumarate (BF). (100MHz, in DMSO). The arrow in the picture refers to organic acid carbon.
